# Supplementary material for: Development of a composite soil degradation assessment index for cocoa agroecosystems in southwestern Nigeria
Source: Copernicus journal article supplement (doi:10.5194/se-8-827-2017), 2017-08-09
Supplement: Supplementary file 1 [file soil data with SOLID EARTH.xlsx]

## Sheet: Raw Soil Data
SITE	Sand	Silt	Clay	BD	Porosity	WHC	SHC	pH	A.K	TN	Ca	Mg	K	Na	CEC	BS	Cu	Zn	Mn	Emg	Raw
YCP	68	12	20	1.3	0.71	22.9	9.2	5.8	14.6	1.43939	5.6	3.4	0.8	0.1	10.5	94.29	5.7	12.3	22.4	16.8	11.1
YCP	67.6	12.4	20	1.2	0.6	24.9	8.2	6.2	15	1.41572	6	3.1	0.9	0.1	10.8	93.52	5.2	10.8	21.9	13.3	10.7
YCP	68.9	12.2	18.9	1.5	0.73	24.1	9.9	6.5	13.9	1.44154	6.1	4	0.2	0.2	11	95.45	4.2	11.5	22.1	15.2	9.9
YCP	68	12.2	19.8	1.81	0.65	24.8	8.2	5.4	13.7	1.41788	5.4	3.2	0.4	0.1	9.7	93.81	4.4	11.1	22.7	16.8	10.5
YCP	68.3	16.3	15.4	1.39	0.61	26.8	9.8	6.1	14.3	1.42863	5.9	2.8	0.3	0.1	9.9	91.92	4	11.8	16.9	15.4	7.8
YCP	64.8	14	21.2	1.31	0.63	22.5	7.4	5.7	7.6	0.9682	5.7	4	0.9	0.2	11	98.18	6.5	12.5	23.9	11.2	8.1
YCP	65	13.6	21.4	1.25	0.65	23	7.8	6.1	7.9	1.14032	4.9	3.1	0.9	0.1	9.5	94.74	5.1	11.8	21.2	9.7	7.9
YCP	64.4	15.3	20.3	1.23	0.52	21.9	6.9	6.4	7.1	0.974655	6	4	0.5	0.3	11	98.18	5.9	11.2	22.5	9.2	6.5
YCP	65.4	14.3	20.3	1.15	0.56	22.7	6.8	5.3	6.5	1.08223	4.7	3	0.6	0.1	10	84	6.1	12.9	23	11.8	7.2
YCP	64.9	14.3	20.8	1.41	0.54	20.4	7.1	6	7.4	1.18336	5.2	3.6	0.3	0.3	11	85.45	6.4	12.6	21.4	9.1	5.3
MCP	67.8	12.5	19.7	1.35	0.63	17.9	4.1	5.6	7.7	1.16184	8.5	3.8	0.1	0.1	13.4	93.28	9.3	17.2	23.9	10.6	7.1
MCP	66.4	14	19.6	1.23	0.65	19	4.9	6	7.4	1.08654	7.9	3.4	0.5	0.2	12.9	93.02	8.5	15.9	21.2	10.9	6.9
MCP	66.9	12.1	21	1.2	0.56	18.2	4.5	6.3	8.2	1.23714	8	4	0.7	0.3	14	92.86	7.9	16.2	22.5	8.8	5.5
MCP	67.5	12.9	19.6	1.47	0.52	18.9	3.6	5.3	7.1	1.29739	8.1	4	0.4	0.1	15.4	81.82	7.8	15.5	23	10.5	6.2
MCP	67.2	14.7	18.1	1.25	0.54	18.5	3.4	5.8	7.1	1.07578	9	3.7	0.3	0.3	16.3	81.6	7.5	17.7	20.4	9.2	4.3
MCP	65	16	19	1.4	0.6	16.8	4.2	5.5	13.9	1.29093	6.6	3.8	0.2	0.2	13	83.08	9.5	14.2	23.2	9.4	4.1
MCP	69.1	12	18.9	1.33	0.64	17.9	4	5.9	14.5	1.16614	5.9	3.1	0.6	0.4	11.3	88.5	8.3	12.9	22.9	8.9	6.3
MCP	67.3	14.4	18.3	1.25	0.58	15.6	4.6	6.2	14.9	1.07578	6.8	4.1	0.8	0.1	14	84.29	7.5	13.5	22.4	7.2	5.5
MCP	65.7	13.9	20.4	1.34	0.65	15.9	4.8	5.2	15.5	1.14032	5.6	4	0.5	0.2	11	93.64	7.8	14.5	22.8	8.1	6.2
MCP	65.4	16.8	17.8	1.43	0.63	15.8	3.4	5.7	15.2	1.30169	6.1	4.3	0.4	0.1	11.2	97.32	9.4	12.4	19.2	9.9	7.9
MCP	65.1	8.9	26	1.38	0.59	17.8	5.8	5.3	12.9	1.16184	9.5	4	0.8	0.3	15	97.33	10.2	11.1	19.2	9.3	6.5
MCP	66.9	11.6	21.5	1.42	0.63	18.9	6	5.8	13.5	0.981109	8.9	4.5	0.8	0.2	15	96	9.6	10.9	18.8	7.5	7
MCP	65	12.1	22.9	1.45	0.57	16.6	4.9	6.2	11.8	1.11881	9	4.2	0.1	0.3	15	90.67	8.9	9.5	17.6	8.3	5.7
MCP	64.8	10.1	25.1	1.33	0.64	16.8	6.8	5.5	11.5	1.29093	9.1	3.8	0.3	0.3	14.3	94.41	10.5	10.2	16.9	6.9	6.2
MCP	66.4	10.5	23.1	1.42	0.62	16.9	4.5	5.7	12.3	1.14032	10	3	0.2	0.3	15.2	88.82	8.8	8.3	21.5	9	4.6
SCP	70	9.1	20.9	1.33	0.61	13.1	7.1	5.7	12.9	0.978958	5.4	4	0.6	0.1	12	84.17	10.2	7.5	15.9	5.3	5.5
SCP	66.7	9.9	23.4	1.45	0.63	12.8	6.5	5.3	13.5	1.07578	5.9	4.2	0.4	0.3	11.1	97.3	8.7	6.9	16.2	6.1	6
SCP	67.8	11.2	21	1.42	0.59	12.2	6.9	6	13.8	0.666982	6.3	3.5	0.5	0.2	12	87.5	9.8	5.6	14.6	6.9	4.7
SCP	69.9	10.1	20	1.38	0.64	11.3	6.7	5.4	12.1	0.9682	5.6	3.4	0.3	0.1	13.3	70.68	9.3	7.4	15.2	5.2	5.2
SCP	75	6.9	18.1	1.42	0.63	11.6	6.3	5.6	12.7	0.669134	5.8	3.2	0.2	0.2	12.6	74.6	10	5.1	14.1	6.5	3.6
SCP	69.8	11.2	19	1.43	0.61	11.2	5.5	5.9	7.9	0.54004	7.1	3.1	0.5	0.1	13	83.08	11.1	5.5	16.2	7.1	6.5
SCP	70.7	9.7	19.6	1.55	0.51	9.7	4.9	6	8.1	0.514222	5.9	3	0.4	0.1	10.2	92.16	9.8	7.4	14.1	6.9	5
SCP	75	10.9	14.1	1.48	0.54	10.5	5.3	4.9	6.2	0.535737	6.3	2.6	0.2	0.1	13	70.77	11.2	6.6	15.9	5.5	4.2
SCP	78	11.2	10.8	1.53	0.45	10.7	5.1	5.8	8.3	0.548647	5.5	2.2	0.3	0.1	11	73.64	9.7	5.9	15.6	6.2	5.7
SCP	71.3	10.7	18	1.51	0.54	10.4	4.7	5.9	7.5	0.645467	6.2	2.7	0.1	0.1	12.6	72.22	9.2	7.1	13.2	4.3	3.6
SCP	71	9.9	19.1	1.55	0.49	13.2	4.9	5.7	7.8	0.542192	7.1	2.3	0.5	0.1	13	76.92	13.1	7.9	14.6	7.8	6.6
SCP	70.6	10.7	18.7	1.67	0.6	11.8	3.81	5.8	8	0.753044	5.7	2.5	0.4	0.1	12	72.5	11.8	6.2	14.2	6.1	5.8
SCP	70.2	11.9	17.9	1.7	0.55	12.5	2.93	6	6.1	0.509919	6.2	3.2	0.1	0.1	11.6	82.76	12.4	5.3	16.2	5.2	4.6
SCP	70.4	10.5	19.1	1.65	0.57	11.2	3.99	4.6	8.2	0.535737	5.4	2.6	0.3	0.1	11.7	71.79	11.5	6.9	15.1	6.8	3.2
SCP	70.4	11.2	18.4	1.53	0.59	12.8	3.02	5.4	7.4	0.497009	6.1	1.9	0.2	0.1	11	75.45	13.2	4.7	14.9	4.6	4.8

## Sheet: Standard Soil Data
SITE	Sand	Silt	Clay	BD	Porosity	WHC	SHC	pH	Orga C	A.K	Total N	Ca	Mg	K	Na	CEC	BS	Cu	Zn	Mn	Emg	Earthworm
YCP	0.16	-0.12	-0.14	-0.17	1.25	0.92	1.6	0.08	0.194659	0.82	1.41739	-0.83	-0.1	1.42	-0.89	-0.95	0.67	-0.92	0.56	0.95	1.77	1.79
YCP	0.06	0.08	-0.14	-0.58	-0.13	1.35	1.1	1.08	-0.235005	0.92	1.34104	-0.59	-0.47	1.83	-0.89	-0.81	0.59	-1.11	0.12	0.8	0.82	1.63
YCP	0.4	-0.02	-0.56	0.67	1.5	1.18	1.96	1.83	-0.557253	0.64	1.42433	-0.53	0.64	-1.08	0.22	-0.72	0.8	-1.48	0.33	0.86	1.34	1.29
YCP	0.16	-0.02	-0.22	1.96	0.5	1.33	1.1	-0.93	-0.449837	0.59	1.34798	-0.95	-0.35	-0.25	-0.89	-1.31	0.62	-1.41	0.21	1.04	1.77	1.54
YCP	0.24	2.07	-1.91	-3.96	0	1.76	1.91	0.83	-1.41658	0.74	1.38269	-0.65	-0.84	-0.67	-0.89	-1.22	0.42	-1.56	0.41	-0.67	1.39	0.42
YCP	-0.69	0.9	0.32	-0.13	0.25	0.83	0.69	-0.18	-0.342421	-0.97	-0.102581	-0.77	0.64	1.83	0.22	-0.72	1.09	-0.62	0.62	1.39	0.26	0.55
YCP	-0.64	0.69	0.4	-0.38	0.5	0.94	0.89	0.83	-0.557253	-0.9	0.45266	-1.25	-0.47	1.83	-0.89	-1.4	0.72	-1.15	0.41	0.59	-0.15	0.46
YCP	-0.8	1.56	-0.02	-0.46	-1.13	0.7	0.44	1.58	-0.772085	-1.1	-0.0817591	-0.59	0.64	0.17	1.33	-0.72	1.09	-0.85	0.24	0.98	-0.28	-0.12
YCP	-0.53	1.05	-0.02	-0.79	-0.63	0.88	0.39	-1.18	0.302075	-1.25	0.265266	-1.38	-0.59	0.58	-0.89	-1.18	-0.43	-0.77	0.73	1.12	0.42	0.17
YCP	-0.67	1.05	0.17	0.29	-0.88	0.38	0.54	0.58	-0.879501	-1.02	0.59147	-1.07	0.15	-0.67	1.33	-0.72	-0.27	-0.66	0.64	0.65	-0.31	-0.61
MCP	0.11	0.13	-0.25	0.04	0.25	-0.16	-0.98	-0.43	1.37624	-0.95	0.522065	0.93	0.4	-1.5	-0.89	0.36	0.57	0.43	1.97	1.39	0.1	0.13
MCP	-0.27	0.9	-0.29	-0.46	0.5	0.08	-0.58	0.58	1.37624	-1.02	0.279147	0.56	-0.1	0.17	0.22	0.14	0.54	0.13	1.6	0.59	0.18	0.05
MCP	-0.13	-0.07	0.25	-0.58	-0.63	-0.1	-0.78	1.33	1.59107	-0.82	0.764982	0.62	0.64	1	1.33	0.63	0.52	-0.1	1.68	0.98	-0.39	-0.53
MCP	0.03	0.34	-0.29	0.54	-1.13	0.05	-1.24	-1.18	0.731739	-1.1	0.959316	0.68	0.64	-0.25	-0.89	1.27	-0.66	-0.13	1.48	1.12	0.07	-0.24
MCP	-0.05	1.26	-0.87	-0.38	-0.88	-0.03	-1.34	0.08	0.731739	-1.1	0.244444	1.23	0.27	-0.67	1.33	1.67	-0.68	-0.25	2.12	0.36	-0.28	-1.03
MCP	-0.64	1.92	-0.52	0.25	-0.13	-0.4	-0.93	-0.68	1.8059	0.64	0.938495	-0.22	0.4	-1.08	0.22	0.18	-0.53	0.5	1.11	1.18	-0.23	-1.11
MCP	0.46	-0.12	-0.56	-0.04	0.38	-0.16	-1.04	0.33	0.731739	0.79	0.535946	-0.65	-0.47	0.58	2.44	-0.59	0.05	0.05	0.73	1.09	-0.36	-0.2
MCP	-0.02	1.1	-0.79	-0.38	-0.38	-0.66	-0.73	1.08	0.731739	0.9	0.244444	-0.1	0.77	1.42	-0.89	0.63	-0.4	-0.25	0.9	0.95	-0.82	-0.53
MCP	-0.45	0.85	0.02	0	0.5	-0.6	-0.63	-1.43	1.26882	1.05	0.45266	-0.83	0.64	0.17	0.22	-0.72	0.6	-0.13	1.19	1.06	-0.58	-0.24
MCP	-0.53	2.33	-0.98	0.38	0.25	-0.62	-1.34	-0.18	0.839155	0.97	0.973197	-0.53	1.01	-0.25	-0.89	-0.63	1	0.46	0.59	0.01	-0.09	0.46
MCP	-0.61	-1.7	2.17	0.17	-0.25	-0.18	-0.12	-1.18	1.1614	0.38	0.522065	1.53	0.64	1.42	1.33	1.09	1	0.76	0.21	0.01	-0.25	-0.12
MCP	-0.13	-0.33	0.44	0.33	0.25	0.05	-0.02	0.08	0.731739	0.54	-0.0609376	1.17	1.26	1.42	0.22	1.09	0.86	0.54	0.15	-0.11	-0.74	0.09
MCP	-0.64	-0.07	0.98	0.46	-0.5	-0.44	-0.58	1.08	1.26882	0.1	0.383255	1.23	0.89	-1.5	1.33	1.09	0.29	0.28	-0.25	-0.46	-0.52	-0.45
MCP	-0.69	-1.09	1.82	-0.04	0.38	-0.4	0.39	-0.68	0.731739	0.03	0.938495	1.29	0.4	-0.67	1.33	0.77	0.69	0.88	-0.05	-0.67	-0.9	-0.24
MCP	-0.27	-0.89	1.05	0.33	0.13	-0.38	-0.78	-0.18	1.8059	0.23	0.45266	1.84	-0.59	-1.08	1.33	1.18	0.09	0.24	-0.6	0.68	-0.33	-0.9
SCP	0.7	-1.6	0.21	-0.04	0	-1.2	0.54	-0.18	0.302075	0.38	-0.0678781	-0.95	0.64	0.58	-0.89	-0.27	-0.41	0.76	-0.83	-0.96	-1.33	-0.53
SCP	-0.18	-1.19	1.17	0.46	0.25	-1.27	0.23	-1.18	-0.342421	0.54	0.244444	-0.65	0.89	-0.25	1.33	-0.68	1	0.2	-1	-0.88	-1.12	-0.32
SCP	0.11	-0.53	0.25	0.33	-0.25	-1.4	0.44	0.58	-0.342421	0.61	-1.07425	-0.41	0.02	0.17	0.22	-0.27	-0.05	0.61	-1.38	-1.35	-0.9	-0.86
SCP	0.67	-1.09	-0.14	0.17	0.38	-1.59	0.34	-0.93	-0.449837	0.18	-0.102581	-0.83	-0.1	-0.67	-0.89	0.32	-1.85	0.43	-0.86	-1.17	-1.36	-0.66
SCP	2.04	-2.72	-0.87	0.33	0.25	-1.53	0.13	-0.43	-1.41658	0.33	-1.06731	-0.71	-0.35	-1.08	0.22	0	-1.43	0.69	-1.52	-1.49	-1.01	-1.32
SCP	0.65	-0.53	-0.52	0.38	0	-1.61	-0.27	0.33	-1.20175	-0.9	-1.48374	0.08	-0.47	0.17	-0.89	0.18	-0.53	1.1	-1.41	-0.88	-0.85	-0.12
SCP	0.89	-1.3	-0.29	0.88	-1.25	-1.94	-0.58	0.58	-0.718377	-0.84	-1.56703	-0.65	-0.59	-0.25	-0.89	-1.09	0.45	0.61	-0.86	-1.49	-0.9	-0.74
SCP	2.04	-0.68	-2.41	0.58	-0.88	-1.76	-0.38	-2.18	-0.557253	-1.33	-1.49762	-0.41	-1.09	-1.08	-0.89	0.18	-1.84	1.14	-1.09	-0.96	-1.28	-1.07
SCP	2.84	-0.53	-3.68	0.79	-2	-1.72	-0.48	0.08	-0.772085	-0.79	-1.45598	-0.89	-1.58	-0.67	-0.89	-0.72	-1.53	0.58	-1.29	-1.05	-1.09	-0.45
SCP	1.05	-0.79	-0.91	0.71	-0.88	-1.79	-0.68	0.33	-1.41658	-1	-1.14366	-0.47	-0.96	-1.5	-0.89	0	-1.69	0.39	-0.95	-1.76	-1.6	-1.32
SCP	0.97	-1.19	-0.48	0.88	-1.5	-1.18	-0.58	-0.18	-0.879501	-0.92	-1.4768	0.08	-1.46	0.17	-0.89	0.18	-1.18	1.85	-0.71	-1.35	-0.66	-0.07
SCP	0.86	-0.79	-0.64	1.38	-0.13	-1.48	-1.13	0.08	-1.41658	-0.87	-0.796631	-0.77	-1.21	-0.25	-0.89	-0.27	-1.66	1.36	-1.21	-1.46	-1.12	-0.41
SCP	0.75	-0.17	-0.95	1.5	-0.75	-1.33	-1.58	0.58	-0.772085	-1.36	-1.58091	-0.47	-0.35	-1.5	-0.89	-0.45	-0.56	1.59	-1.47	-0.88	-1.36	-0.9
SCP	0.81	-0.89	-0.48	1.29	-0.5	-1.61	-1.04	-2.93	-1.20175	-0.82	-1.49762	-0.95	-1.09	-0.67	-0.89	-0.41	-1.73	1.25	-1	-1.2	-0.93	-1.49
SCP	0.81	-0.53	-0.75	0.79	-0.25	-1.27	-1.53	-0.93	-0.986917	-1.02	-1.62255	-0.53	-1.95	-1.08	-0.89	-0.72	-1.34	1.89	-1.64	-1.26	-1.52	-0.82
