# Supplementary material for: Development of a composite soil degradation assessment index for cocoa agroecosystems in southwestern Nigeria
Source: Copernicus journal article supplement (doi:10.5194/se-8-827-2017), 2017-08-09
Supplement: Supplementary file [file se-8-827-2017-supplement-title-page.pdf › se-8-827-2017-supplement-title-page.pdf]

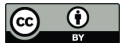

## *Supplement of*

# **Development of a composite soil degradation assessment index for cocoa agroecosystems in southwestern Nigeria**

**Sunday Adenrele Adeniyi et al.**

*Correspondence to:* Sunday Adenrele Adeniyi (releadegeography@yahoo.com)

- se-8-827-2017-supplement-title-page.pdf
- soil data with SOLID EARTH.xlsx

The copyright of individual parts of the supplement might differ from the CC BY 3.0 License.
